# Supplementary material
Source: PubMed Central journal article supplement (PMC9023868)
Supplement: mmc1.pdf [file mmc1.pdf]

# THE LANCET

## Supplementary appendix

This appendix formed part of the original submission and has been peer reviewed. We post it as supplied by the authors.

Supplement to: Menni C, aldes A M, Polidori L, et al. Symptom prevalence, duration, and risk of hospital admission in individuals infected with SARS-CoV-2 during periods of omicron and delta variant dominance: a prospective observational study from the ZOE COVID Study. *Lancet* 2022; published online April 7. [https://doi.org/10.1016/S0140-6736\(22\)00327-0](https://doi.org/10.1016/S0140-6736(22)00327-0).

# A comparison of SARS-CoV-2 symptom prevalence, duration and risk of hospitalisation among vaccinated individuals from the ZOE COVID Study during Omicron versus Delta variant dominant periods

Cristina Menni<sup>1\*</sup>, PhD, Prof. Ana M. Valdes<sup>2,\*</sup>, PhD, Lorenzo Polidori<sup>3</sup>, MSc, Michela Antonelli<sup>4</sup>, PhD, Satya Penamakuri<sup>3</sup>, MSc, Ana Nogal<sup>1</sup>, MSc, Panayiotis Louca<sup>1</sup>, MSc, Anna May<sup>3</sup>, MA, Jane C. Figueiredo<sup>5</sup>, PhD, Christina Hu<sup>3</sup>, MA, Erika Molteni<sup>4</sup>, PhD, Liane Canas<sup>4</sup>, PhD, Marc F Österdahl<sup>1,6</sup>, MBBS, Marc Modat<sup>4</sup>, PhD, Carole H. Sudre<sup>4,7,8</sup>, PhD, Ben Fox<sup>3</sup>, BSc, Prof. Alexander Hammers<sup>4,9</sup>, PhD, Jonathan Wolf<sup>3</sup>, MA, Joan Capdevila<sup>3</sup>, PhD, Prof. Andrew T Chan, M.D<sup>10</sup>, Prof. Sean P David<sup>11</sup>, MD, Claire J Steves<sup>1,6</sup>, PhD, Prof. Sebastien Ourselin<sup>4§</sup>, PhD, Prof. Tim D. Spector<sup>1\*§</sup>, MD

## APPENDIX

### Table of Contents

|                                                                                                                                                                                 |   |
|---------------------------------------------------------------------------------------------------------------------------------------------------------------------------------|---|
| <b>Supplementary Methods</b>                                                                                                                                                    | 2 |
| Exclusion Criteria                                                                                                                                                              | 2 |
| Statistical analysis main script                                                                                                                                                | 2 |
| <b>Figure S1.</b> Consort diagram of study design and analytical pipeline.                                                                                                      | 4 |
| <b>Figure S2.</b> Prevalence of symptoms reported by individuals infected when the Omicron variant (navy) or the Delta variant (blue) was dominant.                             | 5 |
| <b>Table S1.</b> List of symptoms queried.                                                                                                                                      | 6 |
| <b>Table S2.</b> Association between symptoms and type of COVID-19 (Omicron or Delta) infection in 2x 4,990 participants testing positive for SARS-CoV-2 by vaccination status. | 8 |

# Supplementary Methods

## Exclusion Criteria

We excluded participant reporting symptoms within 7 days after vaccination because symptoms in that period may not be related to the infection but reflect reactions to the vaccine.

Individuals under the age of 16 were excluded as vaccination in the UK for this age group only started in September 2022 and second doses for this group have only become available from February 10th, 2022<sup>1</sup>. We further excluded those with a BMI > 55 kg/m<sup>2</sup>. Although there were very few outliers with extreme BMI values, such values are more likely to arise from incorrect data entry by the app user.

## References

- 1 JCVI statement on COVID-19 vaccination of children aged 12 to 15 years: 3 September 2021. GOV.UK. <https://www.gov.uk/government/publications/jcvi-statement-september-2021-covid-19-vaccination-of-children-aged-12-to-15-years/jcvi-statement-on-covid-19-vaccination-of-children-aged-12-to-15-years-3-september-2021> (accessed Feb 12, 2022).

## Statistical analysis main script

```
# import the packages
import statsmodels.formula.api as smf
import statsmodels.api as sm
# fix the random seed for fitting
np.random.seed(seed=42)
# define the variables to include
EXOG = ['is_omicron', 'age', 'gender', 'comor', 'vacc_status']
#target = depending on the regression output we choose the target
# define the model to fit
model = smf.glm(
formula=f'{target} ~ C(is_omicron, Treatment(reference=0)) + age + comor + gender + vacc_status',
data=matched_group[EXOG], family = sm.families.Binomial())
res=model.fit()
```

In this code, `matched_group` indicates the DataFrame including the matched participants on age, sex and vaccination status. The target variable of the model is a symptom when we compute ORs for symptom prevalences and it is hospitalisation (binary) when we compute its OR.

**Figure S1.** Consort diagram of study design and analytical pipeline.

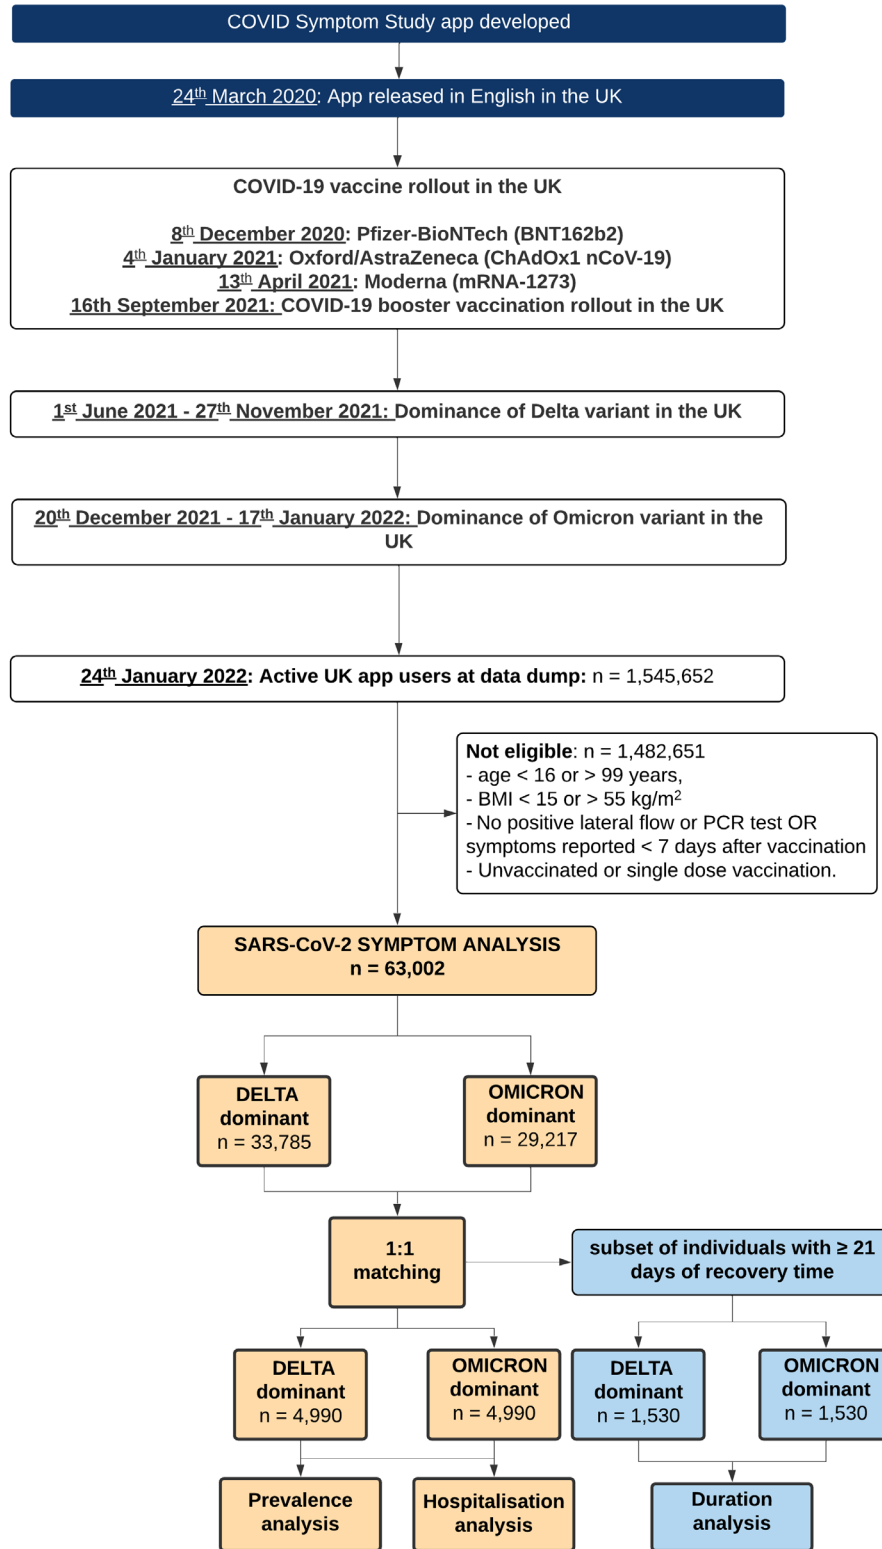

**Figure S2.** Prevalence of symptoms reported by individuals infected when the Omicron variant (navy) or the Delta variant (blue) was dominant. Average % and 95% CI in the overall sample are presented.

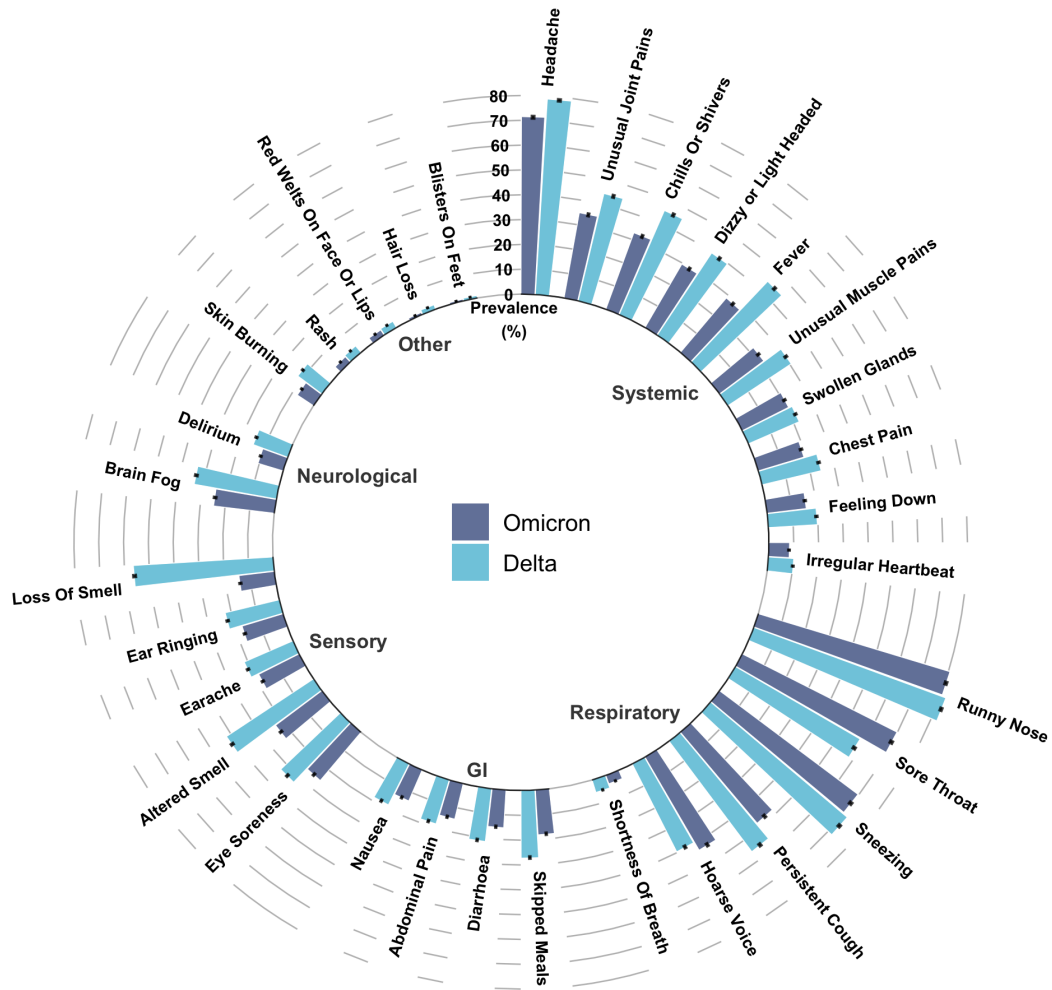

**Table S1.** List of symptoms queried. Mapping between symptom questions in the App and symptom names reported in the manuscript is presented.

| Screen 1 - Are you experiencing any of the below symptoms?                  |                                | Screen 2 - Are you experiencing any symptoms in your head area?                          |                                | Screen 3 - Are you experiencing any symptoms in your throat or chest area?                         |                                | Screen 4 - Are you experiencing any symptoms in your gut or stomach area? |                                |
|-----------------------------------------------------------------------------|--------------------------------|------------------------------------------------------------------------------------------|--------------------------------|----------------------------------------------------------------------------------------------------|--------------------------------|---------------------------------------------------------------------------|--------------------------------|
| Question in the App                                                         | Symptom name in the manuscript | Question in the App                                                                      | Symptom name in the manuscript | Question in the App                                                                                | Symptom name in the manuscript | Question in the App                                                       | Symptom name in the manuscript |
| Fever or feel too hot                                                       | Fever                          | Headache                                                                                 | Headache                       | Sore or painful throat                                                                             | Sore Throat                    | Unusual abdominal pain                                                    | Abdominal Pain                 |
| Chills or shivers (feel too cold)                                           | Chills Or Shivers              | Dizziness or light-headedness                                                            | Dizzy Light Headed             | Swollen neck glands                                                                                | Swollen Glands                 | Nausea or vomiting                                                        | Nausea                         |
| Unusual fatigue                                                             | Fatigue                        | Loss of smell / taste                                                                    | Loss Of Smell                  | Unusually hoarse voice                                                                             | Hoarse Voice                   | Diarrhoea                                                                 | Diarrhoea                      |
| Rash on your arms or torso                                                  | Rash                           | Altered smell / taste (things smell or taste different to usual)                         | Altered Smell                  | Persistent cough (coughing a lot for more than an hour or 3 or more coughing episodes in 24 hours) | Persistent Cough               | Skipping meals                                                            | Skipped Meals                  |
| Red/purple sores or blisters on your feet, including your toes              | Blisters On Feet               | Runny nose                                                                               | Runny Nose                     | Shortness of breath or trouble breathing                                                           | Shortness Of Breath            |                                                                           |                                |
| Raised, red, itchy welts on the skin or sudden swelling of the face or lips | Red Welts On Face Or Lips      | Sneezing more than usual                                                                 | Sneezing                       | Unusual chest pain or tightness in your chest                                                      | Chest Pain                     |                                                                           |                                |
| Strange, unpleasant sensations in your skin like pins & needles or burning  | Skin Burning                   | Unusual eye-soreness or discomfort (light sensitivity, excessive tears, or pink/red eye) | Eye Soreness                   | Usually fast or irregular heartbeat (palpitations)                                                 | Irregular Heartbeat            |                                                                           |                                |
| Unusual hair loss                                                           | Hair Loss                      | Earache                                                                                  | Earache                        |                                                                                                    |                                |                                                                           |                                |

|                                             |                      |                       |             |  |  |  |  |
|---------------------------------------------|----------------------|-----------------------|-------------|--|--|--|--|
| Unusual strong muscle pain or aches         | Unusual Muscle Pains | Ringling in your ears | Ear Ringing |  |  |  |  |
| Unusual joint pains or aches                | Unusual Joint Pains  |                       |             |  |  |  |  |
| Feeling down, depressed or hopeless         | Feeling Down         |                       |             |  |  |  |  |
| Loss of concentrating or memory (brain fog) | Brain Fog            |                       |             |  |  |  |  |
| Confusion, disorientation or drowsiness     | Delirium             |                       |             |  |  |  |  |



**Table S2.** Association between symptoms and type of COVID-19 (Omicron or Delta) infection in 2x4,990 participants testing positive for SARS-CoV-2 by vaccination status. Symptoms' prevalence and odds ratio comparing Omicron vs Delta are presented.

| Symptom           | Prevalence Delta (%) | Prevalence Omicron (%) | Vaccine status | OR [95%CI]         |
|-------------------|----------------------|------------------------|----------------|--------------------|
| Abdominal Pain    | 18.5                 | 13.9                   | 2              | 1.09 [0.97 - 1.22] |
| Abdominal Pain    | 15.8                 | 19.7                   | 3              | 0.87 [0.69 - 1.11] |
| Altered Smell     | 41.9                 | 22.3                   | 2              | 0.53 [0.48 - 0.58] |
| Altered Smell     | 32.4                 | 27.7                   | 3              | 0.6 [0.49 - 0.73]  |
| Blisters On Feet  | 1.0                  | 0.5                    | 2              | 0.48 [0.28 - 0.84] |
| Blisters On Feet  | 1.0                  | 0.8                    | 3              | 0.74 [0.3 - 1.87]  |
| Brain Fog         | 33.6                 | 24.2                   | 2              | 0.76 [0.69 - 0.84] |
| Brain Fog         | 28.4                 | 27.6                   | 3              | 0.85 [0.69 - 1.03] |
| Chest Pain        | 25.8                 | 24.7                   | 2              | 0.96 [0.86 - 1.06] |
| Chest Pain        | 18.9                 | 17.4                   | 3              | 0.94 [0.75 - 1.18] |
| Chills Or Shivers | 40.4                 | 43                     | 2              | 1.12 [1.03 - 1.23] |
| Chills Or Shivers | 35.5                 | 30.8                   | 3              | 0.83 [0.69 - 0.99] |
| Delirium          | 16.0                 | 16.1                   | 2              | 1.01 [0.89 - 1.14] |
| Delirium          | 9.8                  | 10.3                   | 3              | 1.12 [0.84 - 1.49] |
| Diarrhoea         | 20.7                 | 16.2                   | 2              | 0.89 [0.8 - 1]     |

| Symptom            | Prevalence Delta (%) | Prevalence Omicron (%) | Vaccine status | OR [95%CI]         |
|--------------------|----------------------|------------------------|----------------|--------------------|
| Diarrhoea          | 16.2                 | 18.7                   | 3              | 1.05 [0.83 - 1.32] |
| Dizzy Light Headed | 39.6                 | 35.8                   | 2              | 0.86 [0.78 - 0.94] |
| Dizzy Light Headed | 29.8                 | 28.7                   | 3              | 0.99 [0.82 - 1.2]  |
| Ear Ringing        | 20.7                 | 17                     | 2              | 0.87 [0.78 - 0.98] |
| Ear Ringing        | 20.0                 | 18.4                   | 3              | 0.82 [0.66 - 1.03] |
| Earache            | 23.1                 | 21.6                   | 2              | 0.92 [0.83 - 1.03] |
| Earache            | 15.0                 | 17.3                   | 3              | 1.23 [0.97 - 1.56] |
| Eye Soreness       | 32.1                 | 27.7                   | 2              | 0.82 [0.74 - 0.9]  |
| Eye Soreness       | 30.6                 | 24.8                   | 3              | 0.78 [0.64 - 0.95] |
| Feeling Down       | 21.1                 | 20.4                   | 2              | 0.96 [0.86 - 1.07] |
| Feeling Down       | 17.2                 | 14.6                   | 3              | 0.84 [0.67 - 1.07] |
| Fever              | 44.1                 | 26.7                   | 2              | 0.82 [0.75 - 0.9]  |
| Fever              | 25.8                 | 39.2                   | 3              | 1.09 [0.9 - 1.33]  |
| Hair Loss          | 2.1                  | 0.9                    | 2              | 0.51 [0.35 - 0.74] |
| Hair Loss          | 1.4                  | 1.1                    | 3              | 0.75 [0.33 - 1.69] |
| Headache           | 79.7                 | 68.2                   | 2              | 0.84 [0.75 - 0.93] |
| Headache           | 71.3                 | 76.5                   | 3              | 0.87 [0.72 - 1.06] |

| Symptom                   | Prevalence Delta (%) | Prevalence Omicron (%) | Vaccine status | OR [95%CI]         |
|---------------------------|----------------------|------------------------|----------------|--------------------|
| Hoarse Voice              | 39.6                 | 42.8                   | 2              | 1.15 [1.05 - 1.26] |
| Hoarse Voice              | 31.1                 | 42                     | 3              | 1.62 [1.35 - 1.94] |
| Irregular Heartbeat       | 10.5                 | 11.3                   | 2              | 1.1 [0.95 - 1.27]  |
| Irregular Heartbeat       | 8.0                  | 7.6                    | 3              | 0.98 [0.71 - 1.35] |
| Loss Of Smell             | 56.7                 | 17.6                   | 2              | 0.16 [0.14 - 0.18] |
| Loss Of Smell             | 38                   | 13.2                   | 3              | 0.24 [0.2 - 0.3]   |
| Nausea                    | 13.8                 | 12.6                   | 2              | 1.12 [1 - 1.25]    |
| Nausea                    | 18.2                 | 19.7                   | 3              | 0.95 [0.73 - 1.23] |
| Persistent Cough          | 52.3                 | 49.9                   | 2              | 0.92 [0.84 - 1]    |
| Persistent Cough          | 42                   | 49.5                   | 3              | 1.4 [1.18 - 1.67]  |
| Rash                      | 3.7                  | 3.6                    | 2              | 0.96 [0.75 - 1.21] |
| Rash                      | 2                    | 2.8                    | 3              | 1.42 [0.8 - 2.51]  |
| Red Welts On Face Or Lips | 2                    | 2.2                    | 2              | 0.97 [0.75 - 1.26] |
| Red Welts On Face Or Lips | 3.1                  | 3                      | 3              | 1.1 [0.6 - 2.01]   |
| Runny Nose                | 80.9                 | 82.6                   | 2              | 0.66 [0.59 - 0.74] |
| Runny Nose                | 81.8                 | 74.9                   | 3              | 1.11 [0.89 - 1.39] |
| Shortness Of Breath       | 5.7                  | 5.1                    | 2              | 0.95 [0.78 - 1.15] |

| Symptom              | Prevalence Delta (%) | Prevalence Omicron (%) | Vaccine status | OR [95%CI]         |
|----------------------|----------------------|------------------------|----------------|--------------------|
| Shortness Of Breath  | 4                    | 4.3                    | 3              | 1.27 [0.82 - 1.97] |
| Skin Burning         | 8.6                  | 8.1                    | 2              | 0.98 [0.85 - 1.13] |
| Skin Burning         | 11.1                 | 10.8                   | 3              | 1.01 [0.74 - 1.39] |
| Skipped Meals        | 16.9                 | 16.2                   | 2              | 1.08 [0.98 - 1.2]  |
| Skipped Meals        | 25.7                 | 27                     | 3              | 0.99 [0.79 - 1.25] |
| Sneezing             | 69.8                 | 61.3                   | 2              | 0.69 [0.62 - 0.75] |
| Sneezing             | 74.2                 | 69.3                   | 3              | 0.77 [0.63 - 0.93] |
| Sore Throat          | 63.4                 | 71                     | 2              | 1.42 [1.29 - 1.57] |
| Sore Throat          | 51                   | 68.4                   | 3              | 2.11 [1.76 - 2.53] |
| Swollen Glands       | 18.4                 | 19                     | 2              | 1.03 [0.93 - 1.14] |
| Swollen Glands       | 23.9                 | 24.4                   | 3              | 1.06 [0.85 - 1.33] |
| Unusual Joint Pains  | 40                   | 43.5                   | 2              | 1.17 [1.07 - 1.28] |
| Unusual Joint Pains  | 32.6                 | 33                     | 3              | 1.06 [0.88 - 1.27] |
| Unusual Muscle Pains | 30.7                 | 34.2                   | 2              | 1.19 [1.08 - 1.31] |
| Unusual Muscle Pains | 20.5                 | 19.1                   | 3              | 0.95 [0.76 - 1.18] |
